# Supplementary material
Source: PubMed Central journal article supplement (PMC7341821)
Supplement: mmc1.pdf [file mmc1.pdf]

**Immunity, Volume 53**

**Supplemental Information**

**A Genome-wide CRISPR Screen Reveals a Role for the  
Non-canonical Nucleosome-Remodeling BAF Complex  
in Foxp3 Expression and Regulatory T Cell Function**

**Chin-San Loo, Jovylyn Gatchalian, Yuqiong Liang, Mathias Leblanc, Mingjun Xie, Josephine Ho, Bhargav Venkatraghavan, Diana C. Hargreaves, and Ye Zheng**



Figure S2

Foxp3<sup>Lo</sup> Vs. Foxp3<sup>Hi</sup>

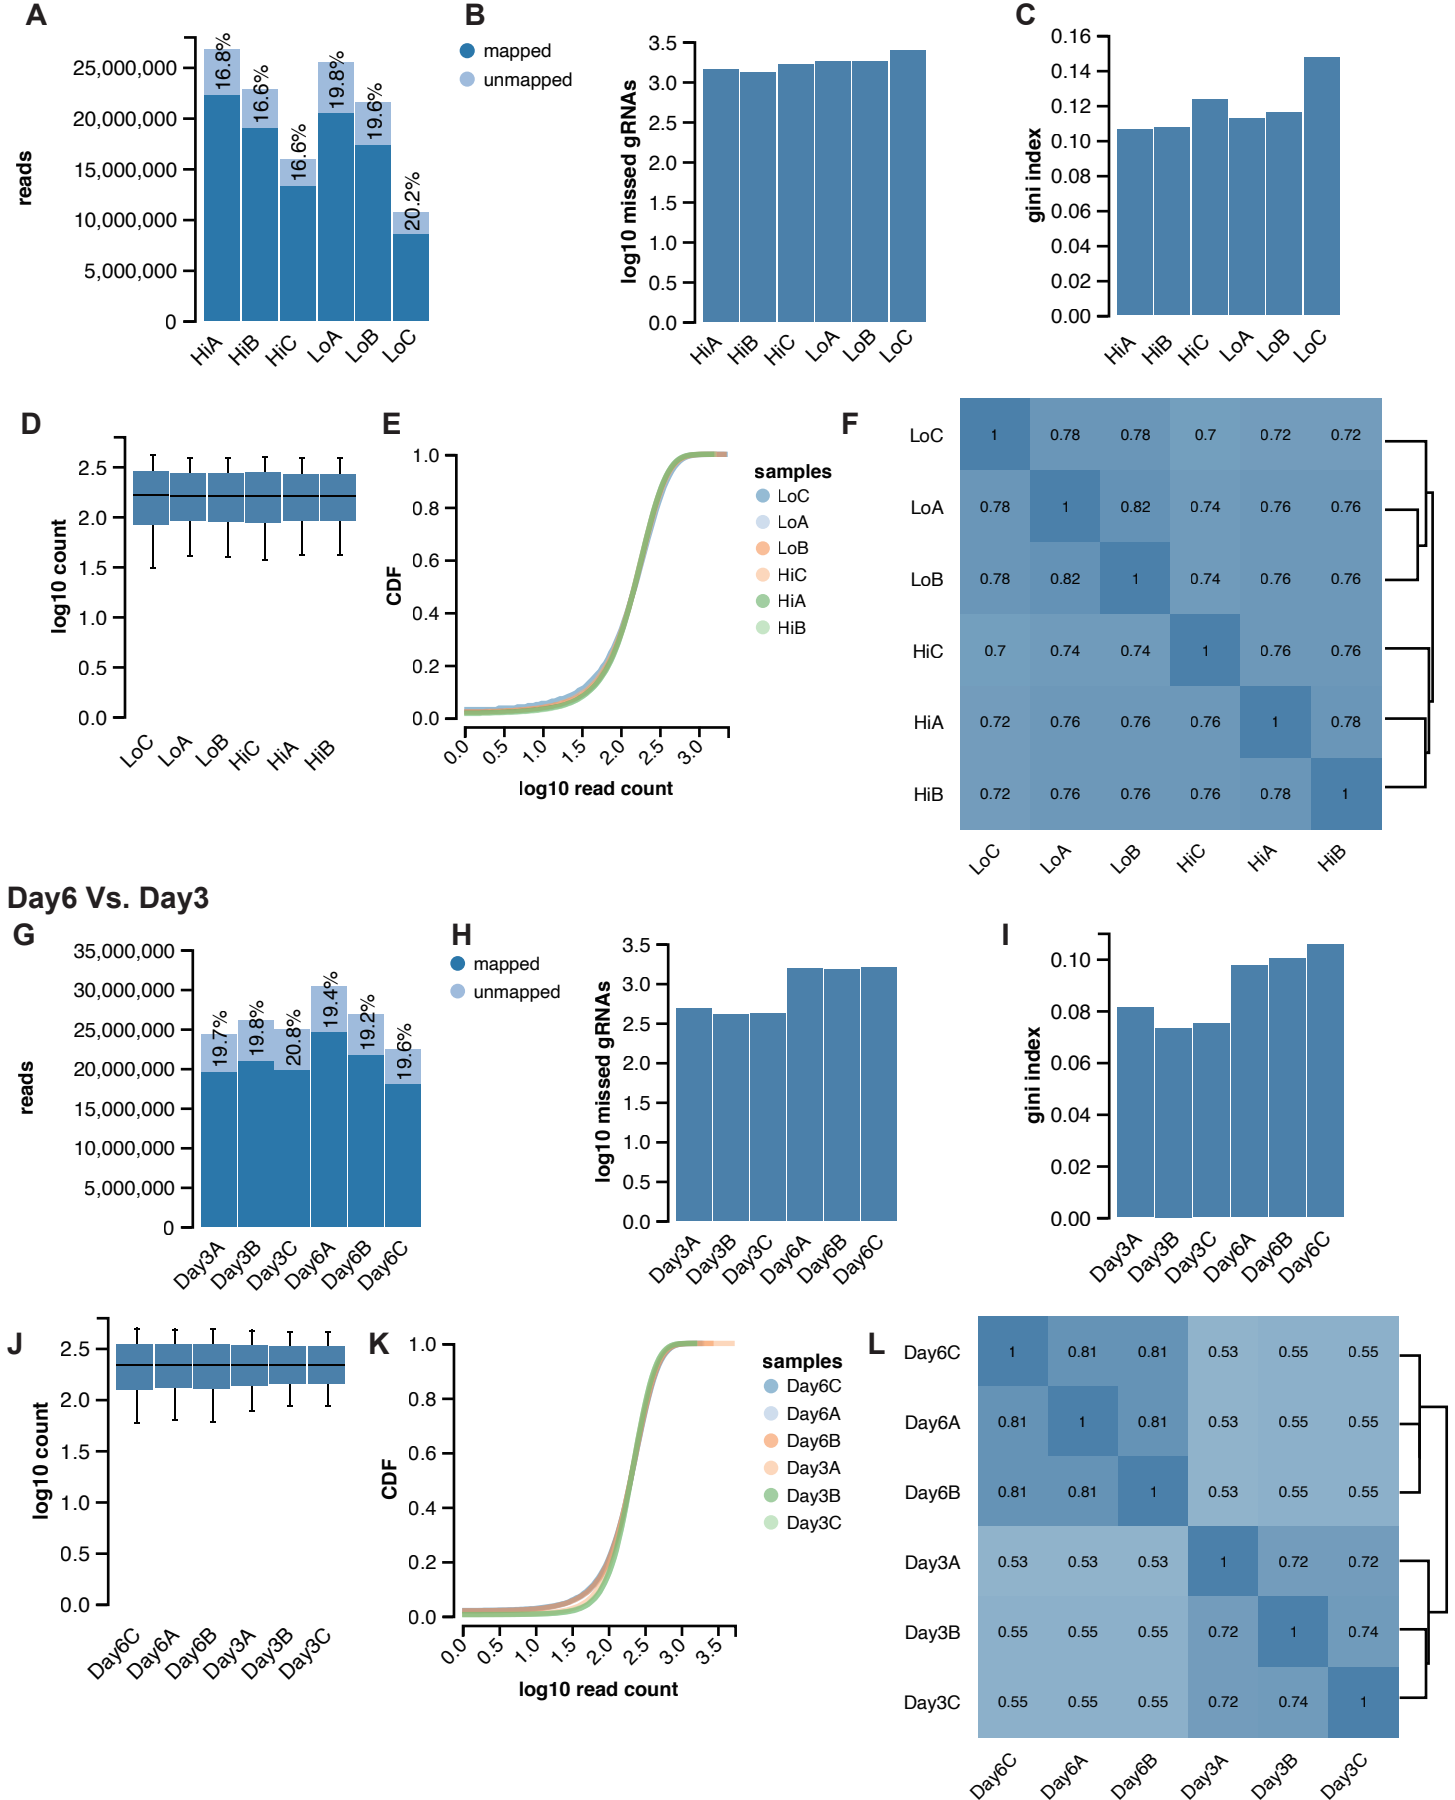

**Figure S2. Quality control analysis of samples generated from the screen in Treg cells, Related to Figure 1.**

Quality control analysis of samples comparing between Foxp3<sup>Lo</sup> and Foxp3<sup>Hi</sup> populations (**A-F**) or between Day 6 and Day 3 NGFR<sup>+</sup> transduced populations (**G-L**). **A, G**, Mapped (dark blue) and unmapped (light blue) reads for each sample. Percentage of unmapped reads is labeled on each bar. **B, H**, Number of missed gRNAs with zero mapped reads. **C, I**, Gini Index for each sample measuring inequality between read counts. **D, J**, Distribution of normalized read counts for each sample. **E, K**, Cumulative distribution function of normalized read counts for each sample. **F, L**, Correlation between normalized log<sub>10</sub> read counts of samples.



**Figure S3**

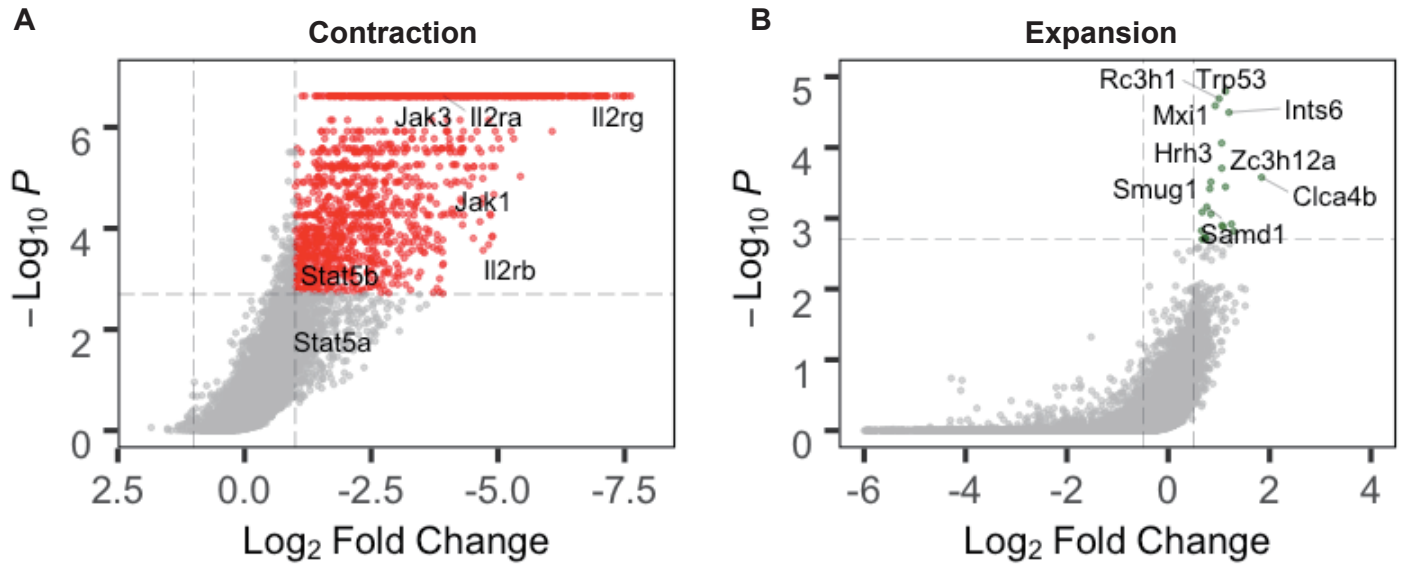

**Figure S3. Identification of genes that regulate cell proliferation and survival from the screen in Treg cells, Related to Figure 2.**

**A,B** Scatter plots showing genes enriched in the cell contraction pool (**A**) or cell expansion pool (**B**) by comparing NGFR+ transduced cells on day 6 to NGFR+ transduced cells on day 3, from the screen in Treg cells. Cutoff was set for contraction is P-value  $< 0.002$  and LFC  $> 1$  (Red dots), whereas cutoff for expansion was set P value  $< 0.002$  and LFC  $> 0.5$  (Green dots).

**Figure S4**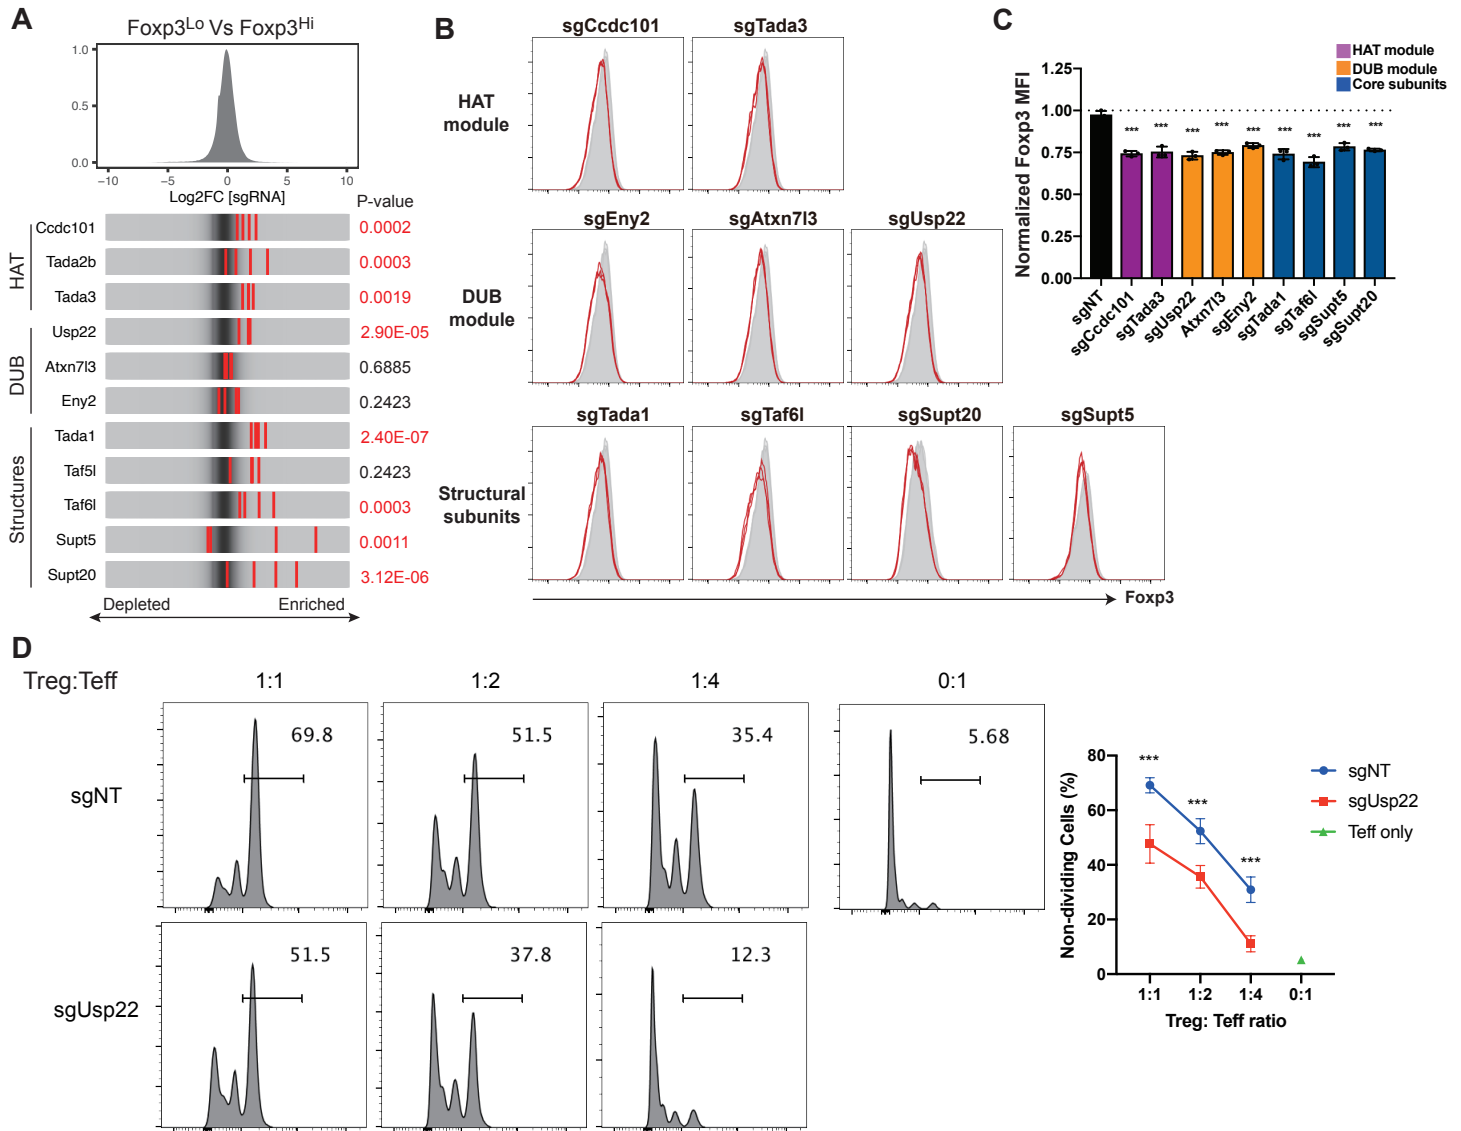**Figure S4. The SAGA complex regulates Foxp3 expression and Treg suppressor activity, Related to Figure 2.**

**A**, Distribution of sgRNA Log<sub>2</sub>FC comparing Foxp3<sup>Lo</sup> to Foxp3<sup>Hi</sup>. Red stripes represent sgRNAs from positive Foxp3 regulators. Genes with a P-value of less than 0.01 are shown in red. **B**, FACS plot of Foxp3 expression in Treg cells transduced with sgRNAs against *Ccdc101*, *Tada3*, (HAT module), *Eny2*, *Atxn713* and *Usp22* (DUB module), and *Tada1*, *Taf6l*, *Supt20*, *Supt5* (structural subunits) of SAGA complex (n=3 per group.). **C**, Mean fluorescent intensity (MFI) of Foxp3 in Treg cells transduced with sgRNAs against SAGA subunits. **D**, In vitro suppression assay of Treg cells transduced with sgUsp22. sgNT is non-targeting control. n=3 per group. Data represent mean ± s.d. Statistical analyses were performed using unpaired two-tailed Student's t test (\*\*p<0.01).

**Figure S5**

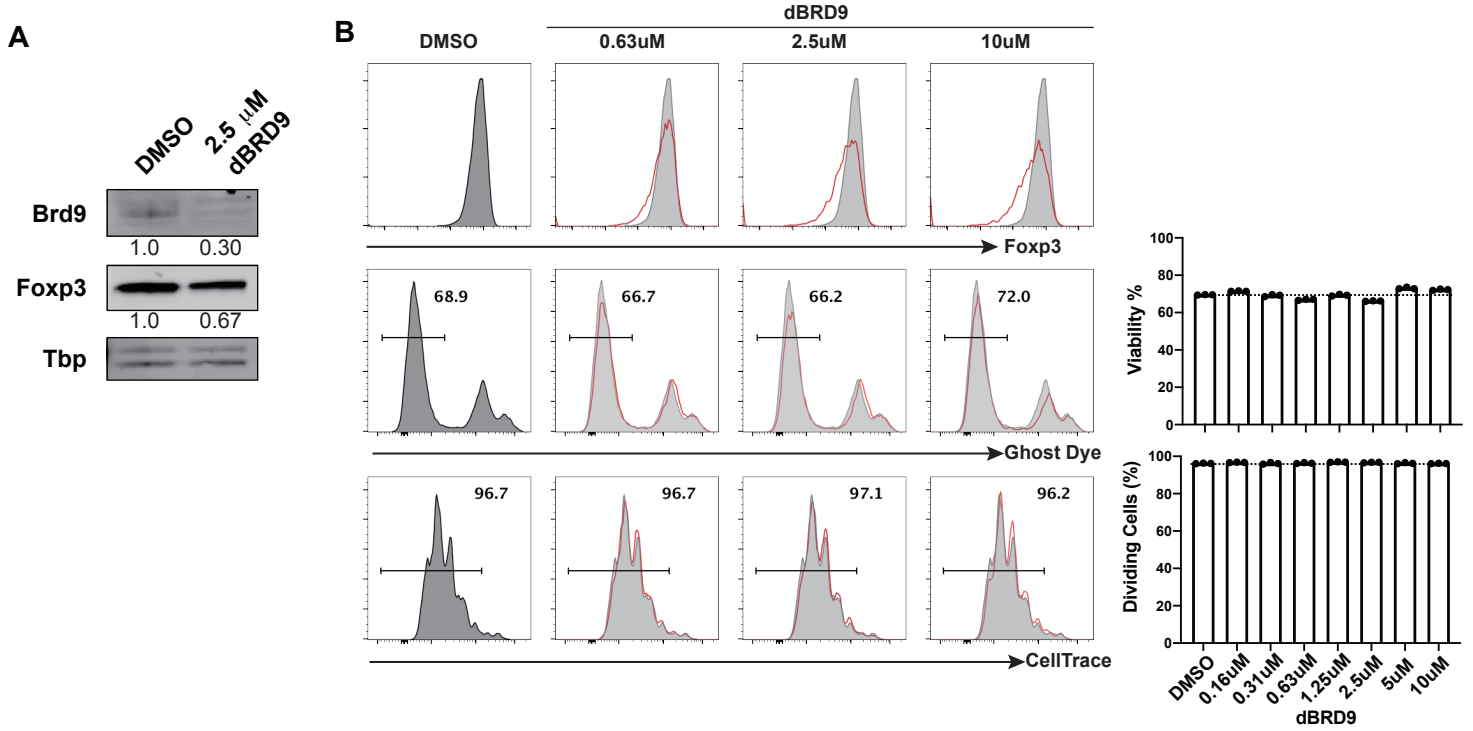

**Figure S5. Brd9 degrader dBRD9 reduces Foxp3 expression without affecting cell viability and proliferation, Related to Figure 3**

**A**, Immunoblotting analysis of Brd9, Foxp3, and TATA-binding protein (Tbp) in nuclear lysates from Treg cells treated with either DMSO or 2.5 μM dBRD9 for four days. Normalized protein levels are indicated. **B**, Foxp3 expression, cell viability labeled by Ghost Dye, and cell division determined by CellTrace dilution in Treg cells after treatment of dBRD9 in increasing concentrations for 4 days (n=3 per group). Grey shade: DMSO. Red line: dBRD9. See also Figure 3E. Data represents mean ± sd. Statistical analyses were performed using unpaired two-tailed Student's t-test. (\*p<0.05, \*\*p<0.01, \*\*\*p<0.001).

**Figure S6**

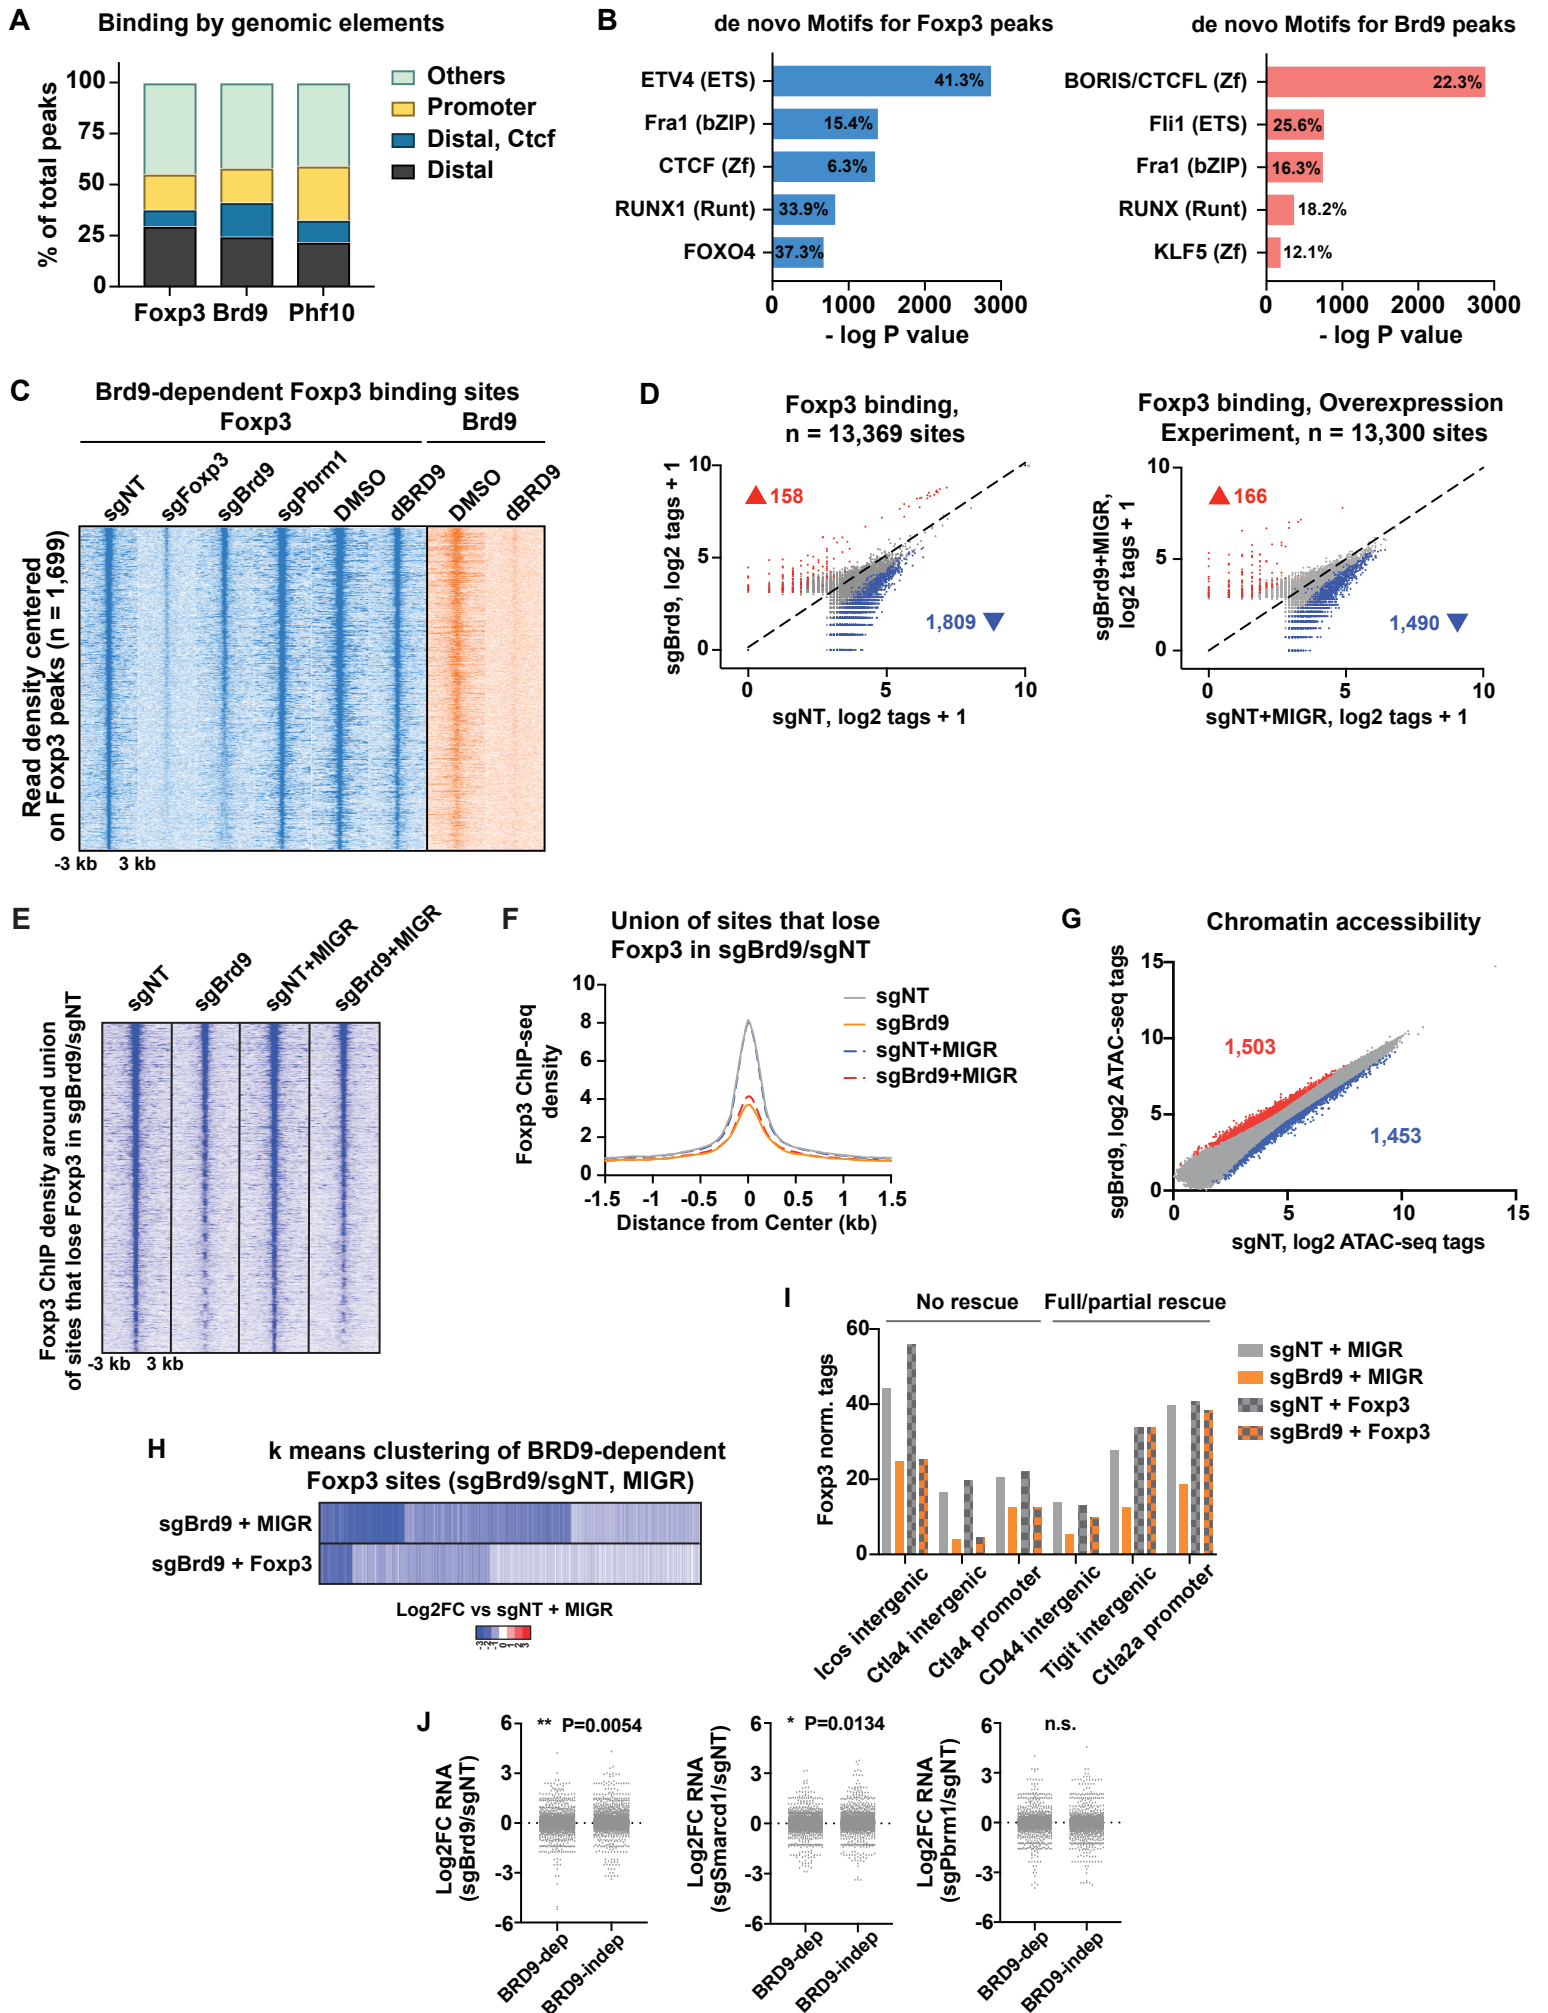

**Figure S6. Brd9 and Foxp3 co-localize on chromatin; Brd9 regulates Foxp3 binding to a subset of Foxp3 binding sites, Related to Figure 4 and 5.**

**A**, Stacked bar graph of sites bound by Foxp3, Brd9, and Phf10 that localize to the indicated genomic elements. **B**, Bar graph showing the top five *de novo* motifs enriched at Foxp3 (left) and Brd9 (right) ChIP-seq peaks, the percentage of sites that contain the motif, and the negative log of P value (Binomial distribution against random genomic background). **C**, Heatmap of Foxp3 ChIP-seq signal in sgNT, sgFoxp3, sgBrd9, and sgPbrm1 transduced Treg cells and DMSO- and dBRD9-treated Treg cells at sites that significantly lose Foxp3 binding in sgBrd9/sgNT and sgFoxp3/sgNT (FC 1.5, Poisson p value < 0.0001). BRD9 ChIP-seq signal is also shown in DMSO- and dBRD9-treated Treg cells. Signal is plotted  $\pm$  3 kb centered on Foxp3 peaks. **D**, Scatterplot of Foxp3 ChIP-seq tags in sgNT and sgBrd9 (left) and sgNT+MIGR and sgBrd9+MIGR (right) at all Foxp3-bound sites. Sites that are significantly up and down by 1.5-fold (Benjamin Hochberg FDR < 0.05) in sgBrd9 vs sgNT are colored red and blue, respectively. Black dashed line represents  $y = x$ . **E**, Heatmap of Foxp3 ChIP-seq density at the union of sites that significantly lose Foxp3 in sgBrd9 vs sgNT in the two experiments shown in D. **F**, Metaplot of Foxp3 ChIP read density surrounding the peak center of sites in E. **G**, Scatterplot of Log<sub>2</sub> ATAC-seq mean tags of duplicates in sgNT versus sgBrd9 Treg cells. **H**, Heatmap of k-means clusters based on Log<sub>2</sub>FC Foxp3 ChIP-seq signal in sgBrd9+MIGR vs sgNT+MIGR and sgBrd9+Foxp3 vs sgNT+MIGR at sites that significantly lose Foxp3 binding in sgBrd9+MIGR vs sgNT+MIGR. **I**, Bar graph showing Foxp3 ChIP-seq signal at select genomic regions. **J**, Log<sub>2</sub>FC RNA in sgBrd9/sgNT, sgSmardc1/sgNT, and sgPbrm1/sgNT of genes that are annotated to sites that are most and least affected by Brd9-dependent Foxp3 change in binding. See Methods section for details of analysis. Unpaired two-tailed Student's t test.

**Figure S7**

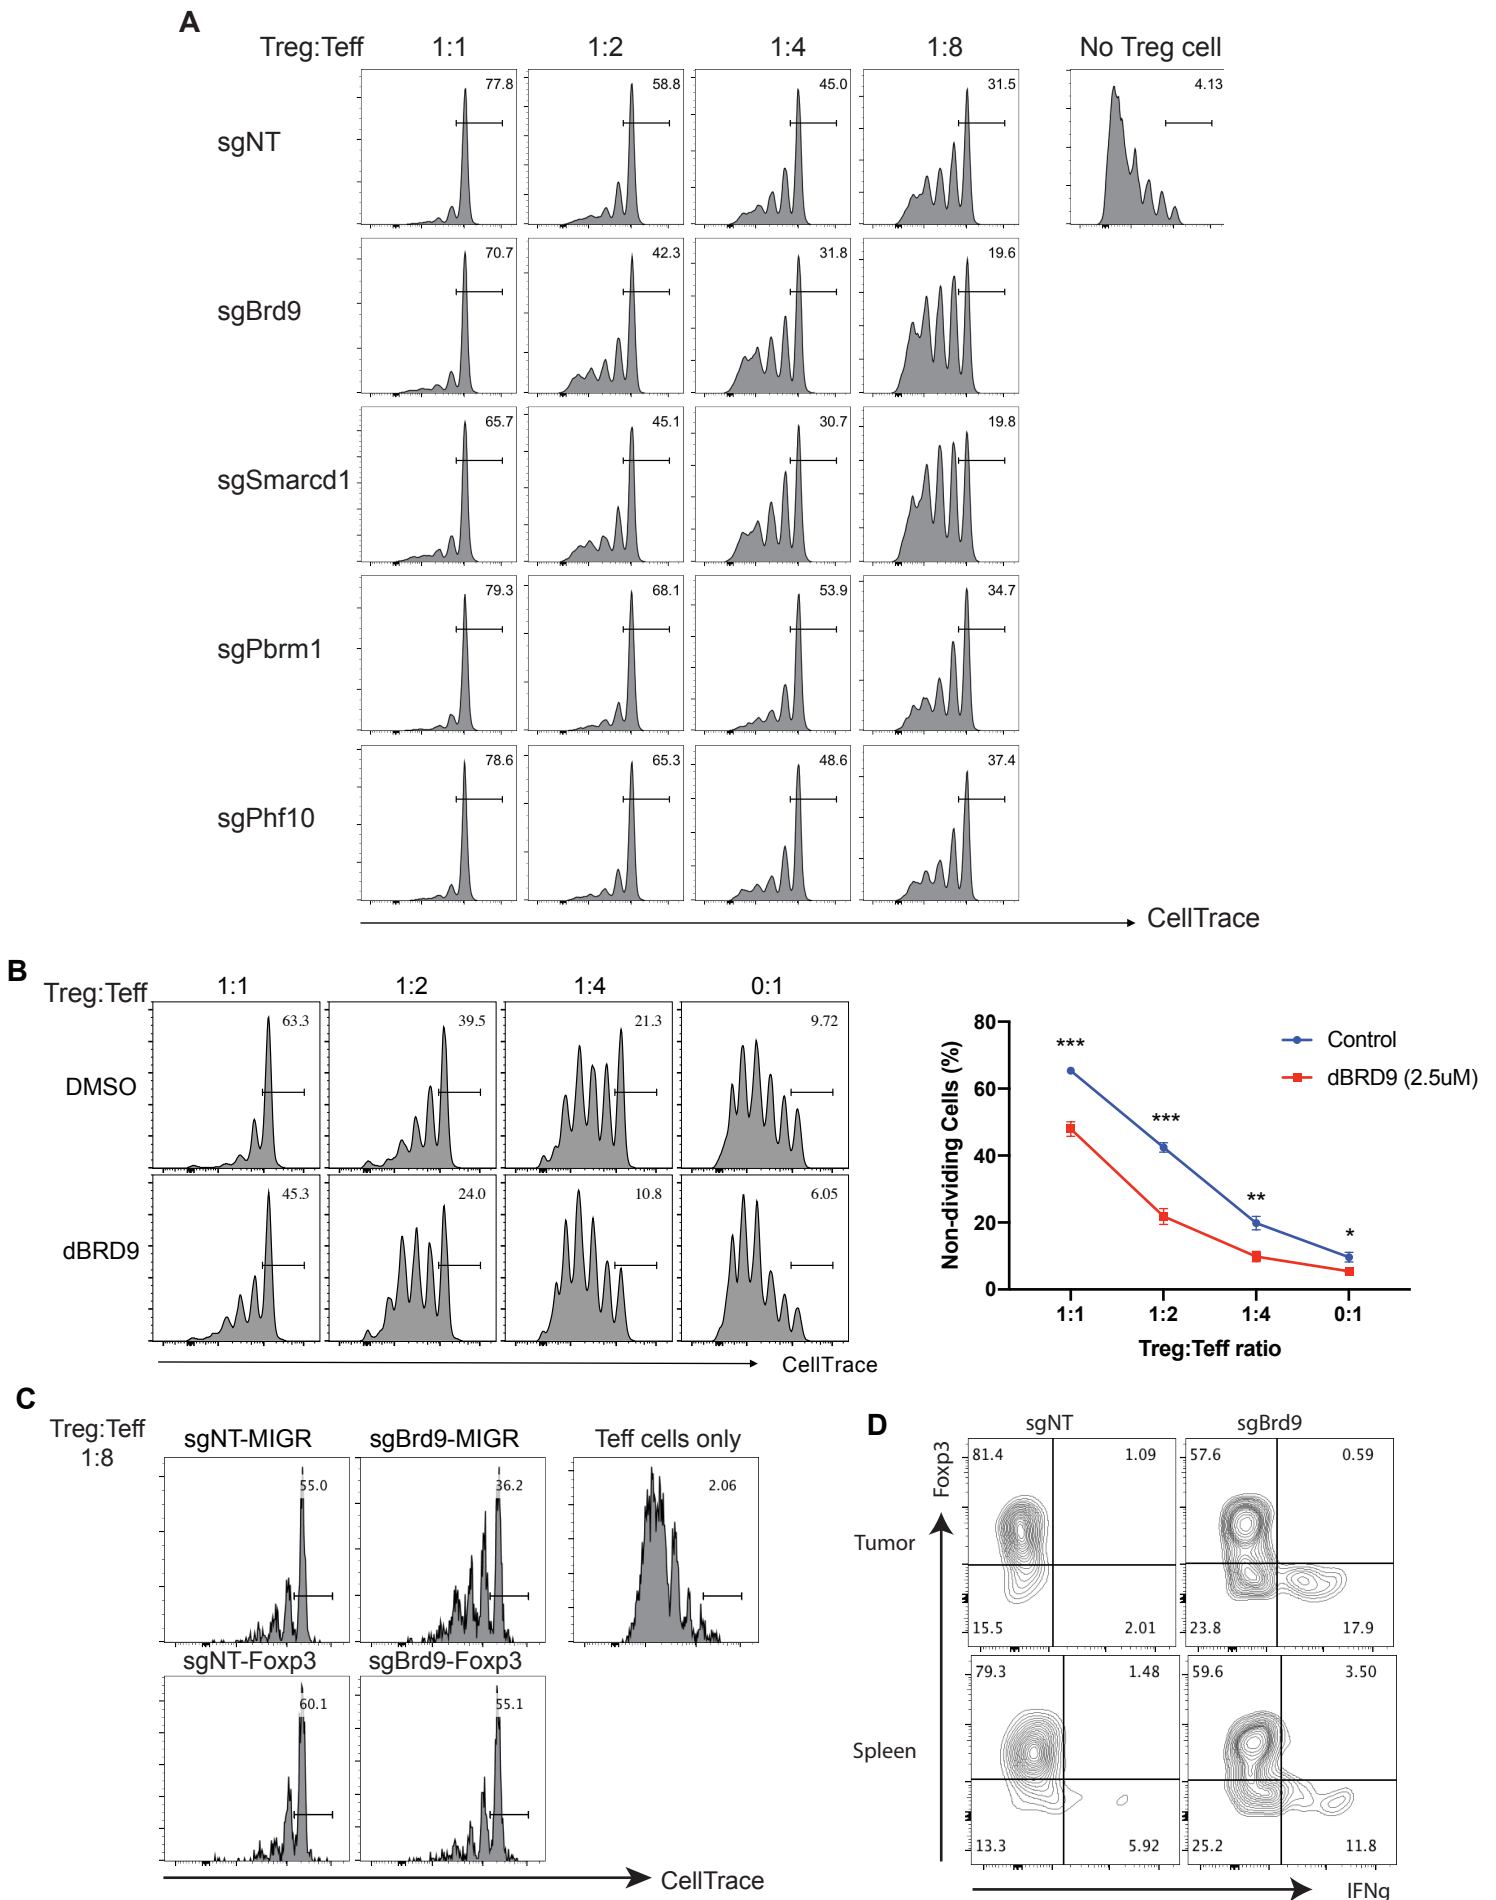

**Figure S7. sgRNA targeting of ncBAF or PBAF subunits or chemical degradation Brd9 alters Treg lineage stability and suppressor function. Related to Figure 6 and 7.**

**A**, *In vitro* suppression assay of Treg cells transduced with sgBrd9, sgSmardc1, sgPbrm1, and sgPhf10. sgNT was used as non-targeting control. See also Figure 6A. **B**, *In vitro* suppression assay using Treg cells treated with dBRD9 or vehicle DMSO. Representative histograms of effector T cell divisions in different Treg:Teff ratios. **C**, *In vitro* suppression assay of Treg cells transduced with sgNT or sgBrd9, with ectopic expression of Foxp3 or empty vector MIGR. Representative histogram of effector T cells divisions in Treg:Teff mixed in 1:8 ratio. See also Figure 6B. (n=3 per group, data represent mean  $\pm$  s.d.). Statistical analyses were performed using unpaired two-tailed Student's t test (ns:  $p \geq 0.05$ , \* $p < 0.05$ , \*\* $p < 0.01$ , \*\*\* $p < 0.001$ ). **D**, FACS analysis of Foxp3 and IFN- $\gamma$  expression in donor Treg cell population (CD4<sup>+</sup> GFP<sup>+</sup>) in MC38 tumor and spleen at the end point. See also Figure 7J and 7K.
